# Supplementary material for: Residential Radon Exposure and Cigarette Smoking in Association with Lung Cancer: A Matched Case-Control Study in Korea
Source: MDPI journal article supplement (doi:10.3390/ijerph17082946), 2020-04-24
Supplement: s1 [file s1]

**Table S1.** Associations of residential radon exposure ( $\geq 74$  Bq/m<sup>3</sup>) and cigarette smoking with lung cancer.

| Variables              | Case, n | Control, n | Conditional logistic regression |                 | Conventional logistic regression |                 |
|------------------------|---------|------------|---------------------------------|-----------------|----------------------------------|-----------------|
|                        |         |            | OR (95% CI)*                    | <i>p</i> -value | OR (95% CI)†                     | <i>p</i> -value |
| Residential radon      |         |            |                                 |                 |                                  |                 |
| Low (< 74 Bq/m³)       | 364     | 358        | 1.00 (reference)                |                 | 1.00 (reference)                 |                 |
| High (≥ 74 Bq/m³)      | 155     | 161        | 1.61 (1.16–2.23)                | 0.005           | 1.57 (1.13–2.18)                 | 0.007           |
| Cigarette smoking      |         |            |                                 |                 |                                  |                 |
| Non-smokers            | 297     | 338        | 1.00 (reference)                |                 | 1.00 (reference)                 |                 |
| Smokers                | 222     | 181        | 2.53 (1.60–3.99)                | < 0.001         | 2.50 (1.59–3.94)                 | < 0.001         |
| Radon and smoking      |         |            |                                 |                 |                                  |                 |
| Low-radon non-smokers  | 208     | 233        | 1.00 (reference)                |                 | 1.00 (reference)                 |                 |
| High-radon non-smokers | 89      | 105        | 1.55 (1.02–2.34)                | 0.040           | 1.55 (1.02–2.35)                 | 0.039           |
| Low-radon smokers      | 156     | 125        | 2.39 (1.45–3.95)                | < 0.001         | 2.41 (1.46–3.96)                 | < 0.001         |
| High-radon smokers     | 66      | 56         | 4.16 (2.29–7.57)                | < 0.001         | 3.92 (2.16–7.10)                 | < 0.001         |

\*Adjusted for second-hand smoking, sleeping hours, indoor hours, housing type, floor, presence of house cracks, and green ratio. CI, confidence interval; OR, odds ratio.

†Conventional logistic regression was further adjusted for age and sex.
